# Supplementary material
Source: PubMed Central journal article supplement (PMC6352516)
Supplement: Supp_Fig1.pdf [file Supp_Fig1.pdf]

## Supplementary Data

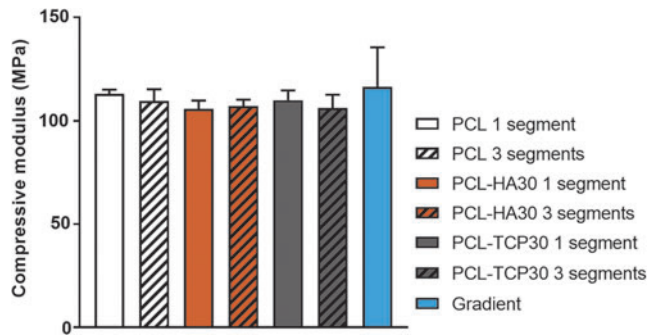

**SUPPLEMENTARY FIG. S1.** Compressive modulus of composite 3D scaffolds printed as one or three segments. No statistical significances were found in the compressive modulus of the PCL and PCL-ceramic scaffolds regardless of the printing method used. Data reported as mean  $\pm$  standard deviation ( $n=5$  scaffolds). 3D, three dimensional; PCL, poly( $\epsilon$ -caprolactone).
