# Supplementary material
Source: PubMed Central journal article supplement (PMC6352516)
Supplement: Supp_Fig2.pdf [file Supp_Fig2.pdf]

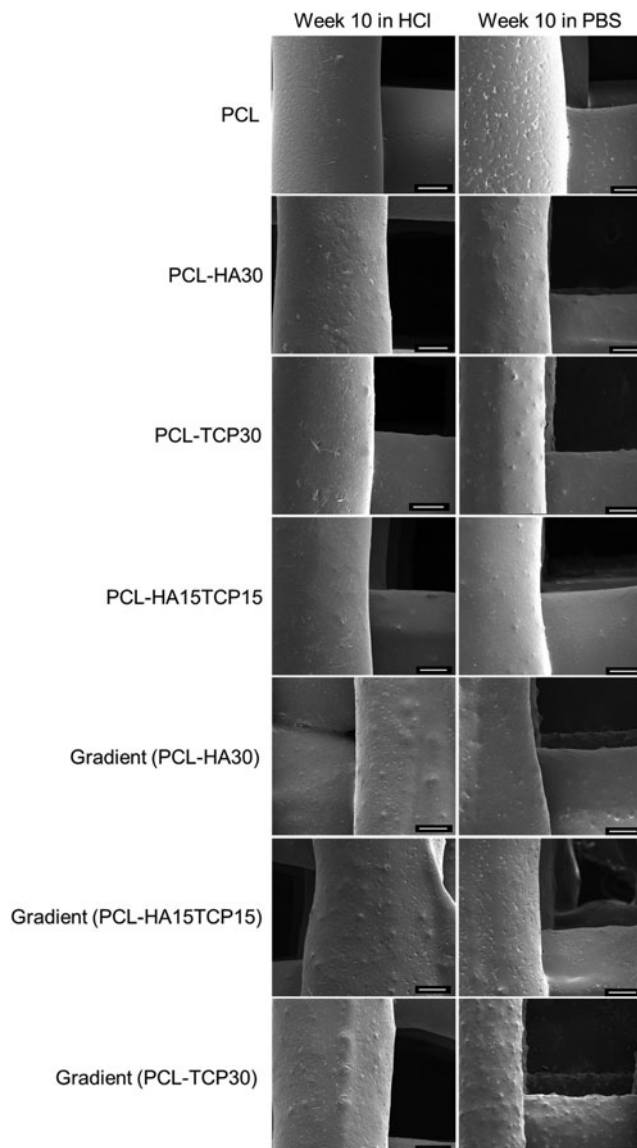

**SUPPLEMENTARY FIG. S2.** SEM micrographs showing the morphology of the surface of the PCL and composite scaffolds, including the different areas of the gradient scaffold, namely PCL-HA30 in the core, PCL-HA15TCP15 in the middle ring, and PCL-TCP30 in the outer ring, after immersion in HCl or PBS at 37°C for 10 weeks. Scale bar = 100 μm. PBS, phosphate-buffered saline; SEM, scanning electron microscopy.
